# Supplementary material for: Risk of Myocarditis and Pericarditis Following Coronavirus Disease 2019 Messenger RNA Vaccination—A Nationwide Study
Source: medRxiv preprint, doi:10.1101/2022.10.11.22280860, version 1 (2022-10-13)
Supplement: Myocarditis/pericarditis after COVID-19 vaccination in Taiwan - Supplementary files [file 280860_file02.pdf]

**Supplementary Table.** Number of ChAdOx1-Sand MVC-COV1901 COVID-19 vaccine recipients, number of myocarditis and pericarditis cases after vaccination, and risk of myocarditis and pericarditis in Taiwan, 2021/3/22-2022/2/9

|       | ChAdOx1-S vaccine |                                    |                            |              |                                    |                            | MVC-COV1901 vaccine |                                    |                            |              |                                    |                            |
|-------|-------------------|------------------------------------|----------------------------|--------------|------------------------------------|----------------------------|---------------------|------------------------------------|----------------------------|--------------|------------------------------------|----------------------------|
|       | First dose        |                                    |                            | Second dose  |                                    |                            | First dose          |                                    |                            | Second dose  |                                    |                            |
| Age   | No. of cases      | No. of people received vaccination | Risk per million vaccinees | No. of cases | No. of people received vaccination | Risk per million vaccinees | No. of cases        | No. of people received vaccination | Risk per million vaccinees | No. of cases | No. of people received vaccination | Risk per million vaccinees |
| Male  |                   |                                    |                            |              |                                    |                            |                     |                                    |                            |              |                                    |                            |
| 12-17 | -                 | -                                  | -                          | -            | -                                  | -                          | -                   | -                                  | -                          | -            | -                                  | -                          |
| 18-24 | 1                 | 346,854                            | 2.88<br>(0.07~16.06)       | 0            | 269,163                            | 0                          | 0                   | 37,185                             | 0                          | 0            | 32,113                             | 0                          |
| 25-29 | 2                 | 362,058                            | 5.52<br>(0.67~19.95)       | 2            | 293,459                            | 6.82<br>(0.83~24.62)       | 0                   | 48,338                             | 0                          | 0            | 42,351                             | 0                          |
| 30-39 | 2                 | 750,993                            | 2.66<br>(0.32~9.62)        | 1            | 625,444                            | 1.60<br>(0.04~8.91)        | 0                   | 113,410                            | 0                          | 0            | 100,745                            | 0                          |
| 40-49 | 1                 | 811,278                            | 1.23<br>(0.03~6.87)        | 0            | 717,578                            | 0                          | 0                   | 97,253                             | 0                          | 0            | 83,373                             | 0                          |
| 50-59 | 1                 | 762,624                            | 1.31<br>(0.03~7.31)        | 0            | 701,679                            | 0                          | 0                   | 74,825                             | 0                          | 0            | 64,184                             | 0                          |

|        |   |           |                      |   |           |                      |   |         |                        |   |         |                       |
|--------|---|-----------|----------------------|---|-----------|----------------------|---|---------|------------------------|---|---------|-----------------------|
| 60-69  | 1 | 412,871   | 2.42<br>(0.06~13.49) | 1 | 383,393   | 2.61<br>(0.07~14.53) | 0 | 51,117  | 0                      | 0 | 43,611  | 0                     |
| 70-79  | 0 | 143,864   | 0                    | 0 | 135,016   | 0                    | 0 | 8,722   | 0                      | 0 | 6,722   | 0                     |
| ≥ 80   | 1 | 202,259   | 4.94<br>(0.13~27.55) | 0 | 180,189   | 0                    | 0 | 2,742   | 0                      | 0 | 1,859   | 0                     |
| Total  | 9 | 3,792,801 | 2.37<br>(1.09~4.50)  | 4 | 3,305,921 | 1.21<br>(0.33~3.10)  | 0 | 433,592 | 0                      | 0 | 374,958 | 0                     |
| Female |   |           |                      |   |           |                      |   |         |                        |   |         |                       |
| 12-17  | - | -         |                      | - | -         | -                    | - | -       | -                      | - | -       | -                     |
| 18-24  | 1 | 353,047   | 2.83<br>(0.07~15.78) | 2 | 284,495   | 7.03<br>(0.85~25.39) | 0 | 36,751  | 0                      | 0 | 33,409  | 0                     |
| 25-29  | 1 | 382,990   | 2.61<br>(0.07~14.55) | 1 | 317,089   | 3.15<br>(0.08~17.57) | 0 | 45,079  | 0                      | 0 | 41,114  | 0                     |
| 30-39  | 1 | 812,766   | 1.23<br>(0.03~6.86)  | 0 | 686,707   | 0                    | 0 | 103,184 | 0                      | 0 | 93,986  | 0                     |
| 40-49  | 2 | 977,281   | 2.05<br>(0.25~7.39)  | 1 | 875,563   | 1.14<br>(0.03~6.36)  | 0 | 87,000  | 0                      | 1 | 76,874  | 13.01<br>(0.33~72.48) |
| 50-59  | 0 | 866,933   | 0                    | 0 | 806,071   | 0                    | 0 | 64,555  | 0                      | 0 | 56,300  | 0                     |
| 60-69  | 0 | 442,727   | 0                    | 0 | 415,595   | 0                    | 1 | 43,110  | 23.20<br>(0.59~129.24) | 0 | 36,730  | 0                     |
| 70-79  | 0 | 153,638   | 0                    | 0 | 145,402   | 0                    | 0 | 8,075   | 0                      | 0 | 5,898   | 0                     |
| ≥ 80   | 0 | 266,919   | 0                    | 0 | 236,912   | 0                    | 0 | 3,799   | 0                      | 0 | 2,507   | 0                     |

|       |   |           |                     |   |           |                     |   |         |                      |   |         |                      |
|-------|---|-----------|---------------------|---|-----------|---------------------|---|---------|----------------------|---|---------|----------------------|
| Total | 5 | 4,256,301 | 1.17<br>(0.38~2.74) | 4 | 3,767,834 | 1.06<br>(0.29~2.72) | 1 | 391,553 | 2.55<br>(0.06~14.23) | 1 | 346,818 | 2.88<br>(0.07~16.07) |
|-------|---|-----------|---------------------|---|-----------|---------------------|---|---------|----------------------|---|---------|----------------------|
